# Supplementary material
Source: PubMed Central journal article supplement (PMC6527505)
Supplement: NIHMS1513155-supplement-12021_2018_9406_MOESM2_ESM.pdf [file NIHMS1513155-supplement-12021_2018_9406_MOESM2_ESM.pdf]

Variables in Dataset

height\_median  
height\_min  
height\_max  
Gamma.glutamyltransferase\_slope  
Gamma.glutamyltransferase\_median  
Gamma.glutamyltransferase\_min  
Gamma.glutamyltransferase\_max  
Absolute.Neutrophil.Count\_slope  
Absolute.Neutrophil.Count\_median  
Absolute.Neutrophil.Count\_min  
Absolute.Neutrophil.Count\_max  
Absolute.Monocyte.Count\_slope  
Absolute.Monocyte.Count\_median  
Absolute.Monocyte.Count\_min  
Absolute.Monocyte.Count\_max  
Total.Cholesterol\_slope  
Total.Cholesterol\_median  
Total.Cholesterol\_min  
Total.Cholesterol\_max  
Absolute.Lymphocyte.Count\_slope  
Absolute.Lymphocyte.Count\_median  
Absolute.Lymphocyte.Count\_min  
Absolute.Lymphocyte.Count\_max  
Triglycerides\_median  
Triglycerides\_min  
Triglycerides\_max  
Absolute.Eosinophil.Count\_slope  
Absolute.Eosinophil.Count\_median  
Absolute.Eosinophil.Count\_min  
Absolute.Eosinophil.Count\_max  
Absolute.Basophil.Count\_slope  
Absolute.Basophil.Count\_median  
Absolute.Basophil.Count\_min  
Absolute.Basophil.Count\_max  
Blood.Urea.Nitrogen..BUN..slope  
Blood.Urea.Nitrogen..BUN..median  
Blood.Urea.Nitrogen..BUN..min  
Blood.Urea.Nitrogen..BUN..max  
Alkaline.Phosphatase\_slope  
Alkaline.Phosphatase\_median  
Alkaline.Phosphatase\_min  
Alkaline.Phosphatase\_max  
AST.SGOT\_slope  
AST.SGOT\_median  
AST.SGOT\_min  
AST.SGOT\_max  
Phosphorus\_slope  
Phosphorus\_median  
Phosphorus\_min  
Phosphorus\_max  
Bilirubin..Total..slope  
Bilirubin..Total..median  
Bilirubin..Total..min  
Bilirubin..Total..max  
fvc\_percent1\_slope  
fvc\_percent1\_median  
fvc\_percent1\_min  
fvc\_percent1\_max  
ALT.SGPT\_slope  
ALT.SGPT\_median  
ALT.SGPT\_min  
ALT.SGPT\_max  
Bicarbonate\_slope  
Bicarbonate\_median  
Bicarbonate\_min  
Bicarbonate\_max  
Basophils\_median  
Basophils\_min  
Basophils\_max  
Hemoglobin\_slope  
Hemoglobin\_median  
Hemoglobin\_min  
Hemoglobin\_max  
CK\_slope  
CK\_median  
CK\_min  
CK\_max  
Albumin\_slope  
Albumin\_median  
Albumin\_min  
Albumin\_max  
fvc\_normal\_slope  
fvc\_normal\_median  
fvc\_normal\_min  
fvc\_normal\_max  
mouth\_slope  
mouth\_median  
mouth\_min  
mouth\_max  
leg\_slope  
leg\_median  
leg\_min  
leg\_max  
respiratory\_slope  
respiratory\_median  
respiratory\_min  
respiratory\_max  
Q3\_Swallowing\_slope  
Q3\_Swallowing\_median  
Q3\_Swallowing\_min  
Q3\_Swallowing\_max  
Eosinophils\_median  
Eosinophils\_min  
Eosinophils\_max  
Hematocrit\_slope  
Hematocrit\_median  
Hematocrit\_min  
Hematocrit\_max  
ALSFRS\_Total\_slope  
ALSFRS\_Total\_median  
ALSFRS\_Total\_min  
ALSFRS\_Total\_max  
Sodium\_slope  
Sodium\_median  
Sodium\_min  
Sodium\_max  
Calcium\_slope  
Calcium\_median  
Calcium\_min  
Calcium\_max  
fvc1\_slope  
fvc1\_median  
fvc1\_min  
fvc1\_max  
Q5\_Cutting\_slope  
Q5\_Cutting\_median  
Q5\_Cutting\_min  
Q5\_Cutting\_max  
Q7\_Turning\_in\_Bed\_slope  
Q7\_Turning\_in\_Bed\_median  
Q7\_Turning\_in\_Bed\_min  
Q7\_Turning\_in\_Bed\_max  
Q10\_Respiratory\_slope  
Q10\_Respiratory\_median  
Q10\_Respiratory\_min  
Q10\_Respiratory\_max  
Q6\_Dressing\_and\_Hygiene\_slope  
Q6\_Dressing\_and\_Hygiene\_median  
Q6\_Dressing\_and\_Hygiene\_min  
Q6\_Dressing\_and\_Hygiene\_max  
Lymphocytes\_median  
Lymphocytes\_min  
Lymphocytes\_max  
hands\_slope  
hands\_median  
hands\_min  
hands\_max  
weight\_slope  
weight\_median  
weight\_min  
weight\_max  
bp\_systolic\_slope  
bp\_systolic\_median  
bp\_systolic\_min  
bp\_systolic\_max  
Glucose\_slope  
Glucose\_median  
Glucose\_min  
Glucose\_max  
respiratory\_rate\_slope  
respiratory\_rate\_median  
respiratory\_rate\_min  
respiratory\_rate\_max  
fvc\_slope  
fvc\_median  
fvc\_min  
fvc\_max  
fvc\_percent\_slope  
fvc\_percent\_median  
fvc\_percent\_min  
fvc\_percent\_max  
Neutrophils\_median  
Neutrophils\_min  
Neutrophils\_max  
Platelets\_slope  
Platelets\_median  
Platelets\_min  
Platelets\_max  
Q2\_Salivation\_slope  
Q2\_Salivation\_median  
Q2\_Salivation\_min  
Q2\_Salivation\_max  
pulse\_slope  
pulse\_median  
pulse\_min  
pulse\_max  
Creatinine\_slope  
Creatinine\_median  
Creatinine\_min  
Creatinine\_max  
Urine.Ph\_slope  
Urine.Ph\_median  
Urine.Ph\_min  
Urine.Ph\_max  
Monocytes\_median  
Monocytes\_min  
Monocytes\_max  
Protein\_slope  
Protein\_median  
Protein\_min  
Protein\_max  
trunk\_slope  
trunk\_median  
trunk\_min  
trunk\_max  
Q8\_Walking\_slope  
Q8\_Walking\_median  
Q8\_Walking\_min  
Q8\_Walking\_max  
White.Blood.Cell..WBC..slope  
White.Blood.Cell..WBC..median  
White.Blood.Cell..WBC..min  
White.Blood.Cell..WBC..max  
Q9\_Climbing\_Stairs\_slope  
Q9\_Climbing\_Stairs\_median  
Q9\_Climbing\_Stairs\_min  
Q9\_Climbing\_Stairs\_max  
bp\_diastolic\_slope  
bp\_diastolic\_median  
bp\_diastolic\_min  
bp\_diastolic\_max  
Q4\_Handwriting\_slope  
Q4\_Handwriting\_median  
Q4\_Handwriting\_min  
Q4\_Handwriting\_max  
Red.Blood.Cells..RBC..slope  
Red.Blood.Cells..RBC..median  
Red.Blood.Cells..RBC..min  
Red.Blood.Cells..RBC..max  
Q1\_Speech\_slope  
Q1\_Speech\_median  
Q1\_Speech\_min  
Q1\_Speech\_max  
Chloride\_slope  
Chloride\_median  
Chloride\_min  
Chloride\_max  
Potassium\_slope  
Potassium\_median  
Potassium\_min  
Potassium\_max  
Q5a\_Cutting\_without\_Gastrostomy\_slope  
Q5a\_Cutting\_without\_Gastrostomy\_median  
Q5a\_Cutting\_without\_Gastrostomy\_min  
Q5a\_Cutting\_without\_Gastrostomy\_max  
Age.y  
onset\_delta.y  
Age.x  
if\_use\_Riluzole  
onset\_delta.x  
treatment\_group  
Race  
onset\_site  
Gender  
ALSFRS\_slope  
SubjectID

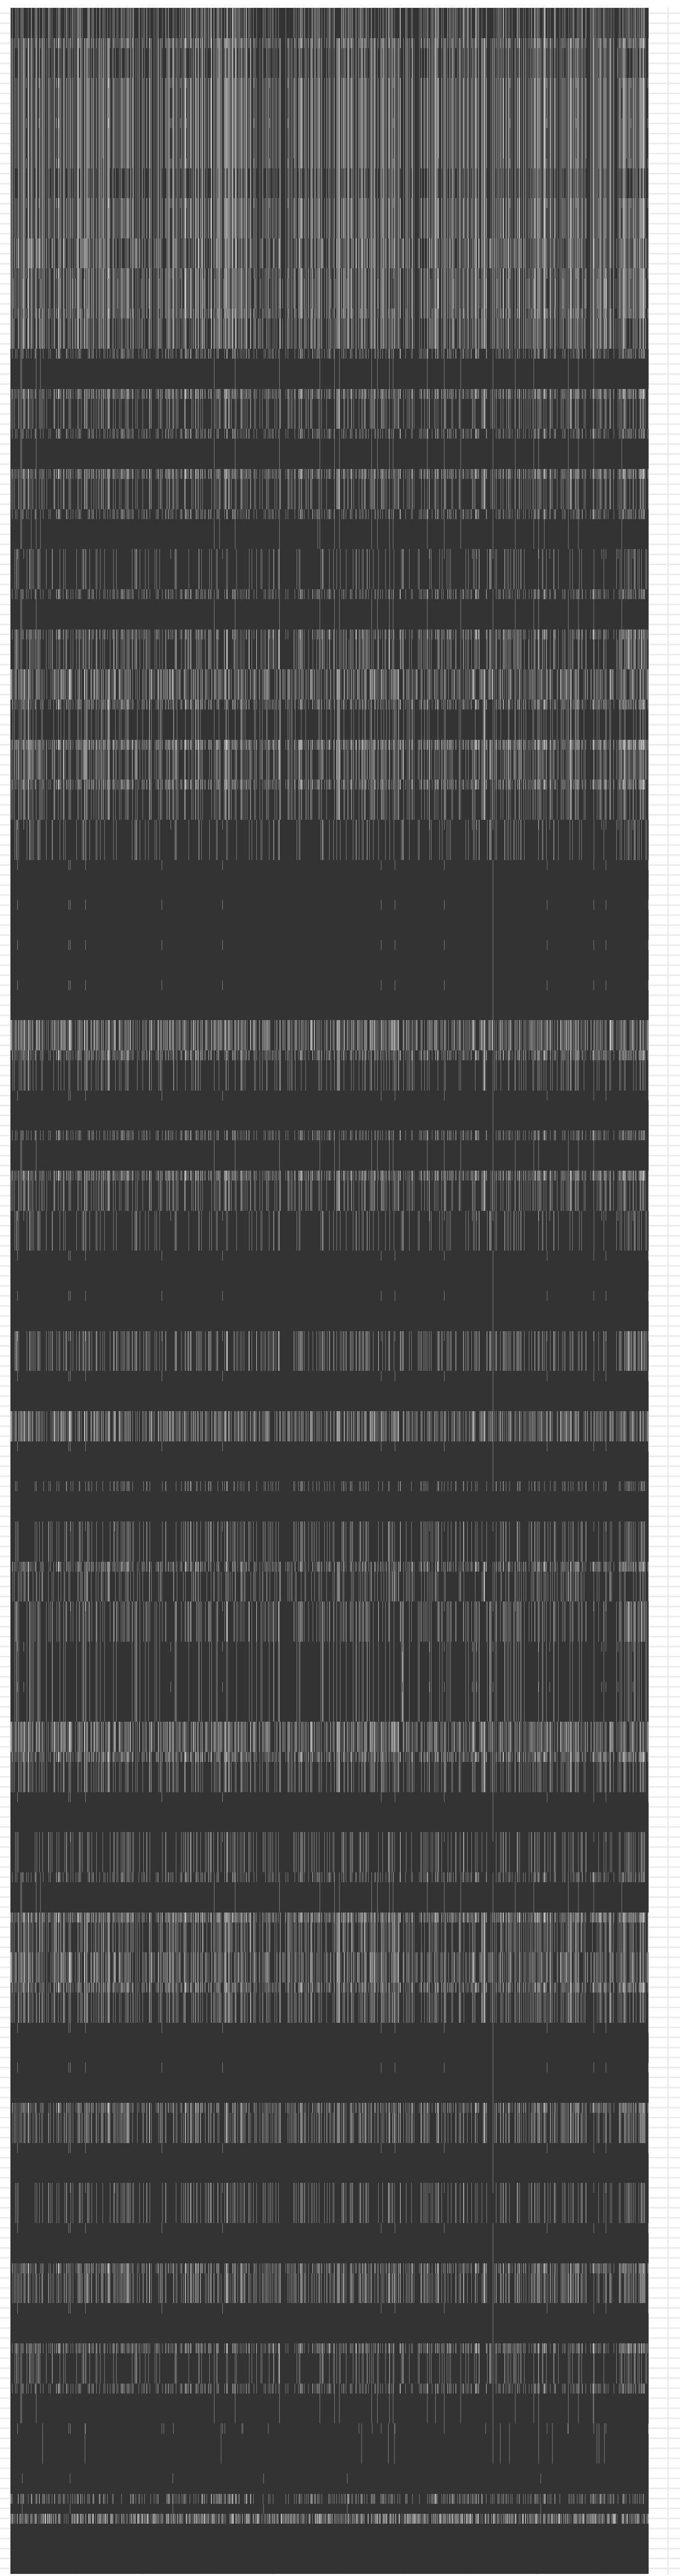

Present  
Missing

0 500 1000 1500 2000 2500  
Rows / observations
